# **Attitudes towards clinical and non-clinical services among individuals who self-harm or attempt suicide: A systematic review**

**ABSTRACT: 199/250 words**

**MAIN TEXT: 4972 /4500 words**

Tasnim Uddin<sup>1</sup>, Alexandra Pitman<sup>1,3</sup>, Gemma Benson<sup>1</sup>, Zeast Kamal<sup>1</sup>, Keith Hawton<sup>3□</sup>, Sarah Rowe<sup>1</sup>

## Affiliations:

1. UCL Division of Psychiatry
2. Camden and Islington NHS Foundation Trust
3. Centre for Suicide Research, Department of Psychiatry, University of Oxford, Warneford Hospital, Oxford, UK
4. Oxford Health NHS Foundation Trust, Oxford, UK

## Abstract

The prevalence of self-harm has increased substantially in recent decades. Despite the development of guidelines for better management and prevention of self-harm, service users report that quality of care remains variable. A previous systematic review of research published to June 2006 documented largely negative experiences of clinical services among patients who self-harm. We reviewed research papers published since then until July 2022 to examine contemporary attitudes towards clinical and non-clinical services among individuals who self-harm and their relatives. We identified 29 studies meeting inclusion criteria, all of which were from high- or middle-income countries and were generally of high methodological quality. Our narrative synthesis identified negative attitudes towards clinical management and organisational barriers across services. Generally, more positive attitudes were found towards non-clinical services providing therapeutic contact, such as voluntary sector organisations and social services, than clinical services, such as emergency departments and inpatient units. Views suggested that negative experiences of service provision may perpetuate a cycle of self-harm. Our review suggests that in recent years there has been little improvement in experiences of services for patients who self-harm. These findings should be used to reform clinical guidelines and staff training across clinical services to promote patient-centred and compassionate care and deliver more effective, acceptable and accessible services.

## Introduction

The prevalence of self-harm has increased globally, with evidence of this in countries such as Norway (Tormoen, Myhre, Walby, Groholt, & Rossow, 2020), England (McManus et al., 2019), the United States, China and India (McManus et al., 2019; Muehlenkamp, Claes, Havertape, & Plener, 2012; Tormoen, Myhre, Walby, Groholt, & Rossow, 2020). Psychologically, self-harm is associated with low self-esteem, interpersonal difficulties, and hopelessness (Fox et al., 2015; Hawton, Saunders, & O'Connor, 2012). Physically, self-harm can result in severe scarring, muscle and nerve damage, infection, and premature death (Hawton et al., 2012; Witt et al., 2021b). Self-harm is the strongest predictor of suicide (Carr et al., 2017; Geulayov et al., 2019; Hawton, Zahl, & Weatherall, 2003) with approximately 50% of individuals who die by suicide having previous episodes of self-harm (Fazel & Runeson, 2020; Foster, Gillespie, & McClelland, 1997).

Healthcare services have been criticised over their management of self-harm. Studies demonstrate a high degree of variation in self-harm management across general hospital settings (Arensman et al., 2018; Cooper et al., 2013). For example, the proportion of patient presentations for self-harm receiving psychosocial assessments in emergency departments in England was approximately 58% although it ranged by hospital from 28% to 91%, (Cooper et al., 2015) despite this being recommended practice for self-harm presentations (NICE, 2022). There is also evidence to support the effectiveness of interventions in preventing repeat self-harm or suicide following a first episode (Witt et al., 2021a, 2021b). Rates of readmission to psychiatric inpatient care for self-harm are highest in the following year, with one third of these occurring in the first month after discharge (Gunnell et al., 2008). Despite this, national guidelines for the short-term management of self-harm have been found to be implemented by healthcare professionals in less than half of the encounters they have with patients (Leather et al., 2020). Together, this evidence highlights a need for standardised and improved care.

Eliciting patients' attitudes towards services providing interventions for self-harm are essential as they identify barriers to service delivery and influence treatment engagement (Ribeiro Coimbra & Noakes, 2022). The '*Interpersonal cycle of reinforcement of self-harm*' (Rayner, Allen, & Johnson, 2005) posits that patients' experiences of stigmatising attitudes from staff and negative therapeutic relationships can feed into negative cognitions about themselves, which can lead to treatment disengagement. Understanding

patients' experiences of services therefore enables identification of key areas of improvement to enhance treatment adherence and improve outcomes (N. Kapur et al., 2013; Rayner et al., 2005; Ribeiro Coimbra & Noakes, 2022).

A systematic review of patients' attitudes towards clinical services following self-harm published in 2009 identified predominantly negative perceptions, including poor communication between patients and staff, limited staff knowledge of self-harm and poor therapeutic relationships (Taylor, Hawton, Fortune, & Kapur, 2009). Many patients suggested a need for improvements in psychosocial assessment, referral pathways and access to after-care. As that review was completed over a decade ago and focussed only on clinical services, an update of the literature is needed to reflect contemporary practice, widening the scope to the full range of services currently available to people who self-harm. The present systematic review aimed to examine attitudes of patients and their families towards clinical and non-clinical self-harm services from research published since the final search date of the previous review (July 2006). We also aimed to compare patients' experiences of clinical and non-clinical services, defining clinical services as those provided by public or private healthcare providers (primarily consisting of clinicians), and non-clinical services as charitable and voluntary sector organisations, social services, and faith-based organisations.

## **Method**

Our review followed the Preferred Reporting Items for Systematic Reviews and Meta-analyses (PRISMA) guidelines (Moher, Liberati, Tetzlaff, Altman, & Group, 2009). We pre-registered the review protocol with PROSPERO (CRD42021264789).

### ***Search Strategy***

As our review represented an update of a previous systematic review (Taylor et al., 2009), we replicated their methodology but expanded our search terms to include clinical and non-clinical services, and updated terminology (supplementary materials: S1).

We searched seven electronic databases (EMBASE, MEDLINE, PsycINFO, Global Health, AMED, HMIC and CINAHL). We also searched Google Scholar and OpenGrey for grey literature. Papers were limited to those in English language and published from July 2006 as the previous review included papers up until June 2006 (Taylor et al., 2009). The initial

search was conducted in July 2021 and the final search was conducted on 1<sup>st</sup> July 2022. The reference lists of included studies were hand-searched to identify further eligible studies.

### ***Inclusion and exclusion criteria***

We included published and unpublished primary research studies capturing the experiences or attitudes towards services of people who self-harm. Eligible studies were those that included participants with at least one episode of self-harm, irrespective of suicidal intent. Studies were excluded if participants experienced attempts of assisted suicide, euthanasia attempts or experienced harm without explicit intent (e.g., accidental overdose). We also included studies capturing the attitudes of carers and relatives of individuals who self-harmed. Studies were included if participants received any medical or psychosocial intervention for their self-harm episode from clinical services (primary or secondary healthcare) or non-clinical services (services outside of healthcare settings including but not limited to social, voluntary sector or faith-based services). In order to maximise the evidence, qualitative, quantitative and mixed methods studies were included, as was the case in the previous review (Taylor et al., 2009). Secondary analyses of data and systematic reviews were excluded.

### ***Study Selection***

Search results were exported into Covidence (Covidence systematic review software, 2021) and de-duplicated. All titles and abstracts were first screened by one reviewer (TU). Full text articles of eligible studies were then screened by a second independent reviewer (ZK or GB) using the predetermined inclusion and exclusion criteria. Any disagreements were resolved through discussions with a third reviewer (SR).

### ***Data extraction***

A data extraction table was used to extract information on authors, publication year, country of origin, sample size, sample characteristics (i.e., demographic information), type of self-harm behaviours, type of services and interventions, methodology, measures of attitudes and relevant quantitative and/or qualitative findings. All data were extracted by one reviewer (TU) and independently verified by a second reviewer (ZK or GB).

### ***Quality assessment***

The quality of included papers was assessed using the Mixed Methods Appraisal Tool

(MMAT) (Hong et al., 2018) by one reviewer (TU) and was independently verified by a second reviewer (ZK or GB). The MMAT has previously been validated for use in systematic reviews and was selected as it is designed to appraise a variety of study designs (Hong et al., 2018). Calculating an overall quality score is discouraged when using the MMAT, therefore, we reported scores for each criterion. There were high levels of agreement between the reviewers, with only one paper requiring discussion. All papers were given equal value in terms of contributing to the findings.

### ***Data synthesis***

We summarised quantitative and qualitative findings using a narrative synthesis approach as we anticipated a wide variety of study designs, sample populations and measures and therefore substantial heterogeneity of findings. We used validated guidelines for narrative syntheses from the Economic and Social Research Council framework to follow established practice (Popay, 2006).

One researcher (TU) first grouped studies by methodology, setting and population, tabulating key findings relevant to attitudes towards services using these categories. Team discussions were used to agree these categories. Findings were then compared across studies to categorise similarities and differences in attitudes by setting and population, and to identify meaningful higher-level constructs (Popay, 2006). The final constructs were synthesised following critical discussion with the wider team until complete agreement on structure and content was reached.

Finally, we sought the perspective of an individual with lived experience of accessing self-harm services to help us interpret findings.

## **Results**

### ***Study selection***

The initial search identified 9,443 studies, which was reduced to 6,028 studies following deduplication (Figure 1). Full text screening was completed on 142 papers with 26 studies were deemed eligible and included in the review. Three further studies were identified from hand-searching the reference list of these included articles. A total of 29 studies were included.

### ***Study characteristics***

Study characteristics of the included studies are summarised in Table 1. Studies were published between 2007 to 2022, all in high- and middle-income countries: these included 11 studies from the UK, four from Sweden, two from Canada, two from China, two from Norway, two from the USA, one from Australia, one from Belgium, one from Finland, one from Ireland, one from Portugal, and one from South Africa. The gender profiles of participants were reported in 25 studies. While one study included only female participants (Lindkvist et al., 2021) and one included only male participants (Hassett & Isbister, 2017), all other studies included a mix of female and male participants, with four studies including transgender, non-binary or other genders. Only three studies reported on participants' ethnicity, all of which included exclusively or majority White participants.

The studies examined attitudes of patients/carers following a patient's presentation for self-harm (n=16), attempted suicide (n=8) or a mixture of self-harm and attempted suicide (n=5). Studies examined patients' attitudes solely (n=24), relatives' attitudes solely (n=2) or both patients' and relatives' attitudes (n=3). Studies exclusively examined one type of service (n=18) or a combination of services (n=11). The clinical services included in studies were psychiatric/inpatient units (n=12), emergency departments (EDs; n=10), primary care (n=4), secure units (n=1), crisis wards/brief admission units (n=3), community-based psychiatric teams (n=3), community-based crisis care (n=2), specialist psychiatric wards (n=1), acute medical wards (n=1) and Child and Adolescent Mental Health Services (n=1). The non-clinical services included in studies were voluntary sector community-based programmes (n=1), social services (n=2) or a voluntary sector helpline (Samaritans; n=1). Based on these categories we made a team decision to group findings by clinical versus non-clinical services.

### ***Quality assessment***

Quality assessment ratings for the studies are presented in Table 2a and 2b. We judged 25 of the 27 qualitative studies to be of high methodological quality. Both the mixed-methods studies were assessed to be of moderate risk of bias.

### ***Attitudes towards services from individuals who self-harm and their relatives***

Our narrative synthesis of studies resulted in the development of four overarching constructs: *staff attitudes, therapeutic contact, clinical management, and organisational barriers*.

## **Staff attitudes**

### *Professional stigma*

The stigmatising attitudes of professionals were reported in nine studies that examined clinical services. Across EDs and inpatient units, patients experienced negative judgements, service gate-keeping or belittling comments regarding their injuries (Mitten, Preyde, Lewis, Vanderkooy, & Heintzman, 2016; Quinlivan et al., 2021; Williams, Nielsen, & Coulson, 2020). Five studies reported a perception that professional stigma acted as a barrier to disclosure, with shame and fear impairing disclosure within psychosocial assessments and when help-seeking (Byrne et al., 2021; Hunter, Chantler, Kapur, & Cooper, 2013; Mitten et al., 2016; O’Keeffe, Suzuki, Ryan, Hunter, & McCabe, 2021; Xanthopoulou, Ryan, Lomas, & McCabe, 2022). Patients reported how their own low self-esteem and self-blame were reinforced by professionals’ stigmatising attitudes (Byrne et al., 2021; Quinlivan et al., 2021; Vandewalle et al., 2019).

Experiences of professionals’ stigmatising attitudes varied between clinical and non-clinical services, with the latter preferred for being more accepting. In one study, patients showed preferences for social services and voluntary sector organisations over hospital services, with the former described as more supportive and having the potential to build long-term relationships with patients (Hume & Platt, 2007). In one community-based programme, staff (voluntary sector youth workers) were described as non-judgemental and friendly, reducing any shame felt by patients (Cross & Clarke, 2022).

Two studies set in clinical services described perceptions of stigma surrounding mental health diagnoses. Patients highlighted how professionals’ interest and compassion diminished after disclosure of a diagnosis of a ‘personality disorder’, with labels of “time-waster” and “attention-seeker” applied (Quinlivan et al., 2021). Whilst one UK-based qualitative study reported experiences of staff withdrawal and rushed assessments (Hunter et al., 2013), another UK-based qualitative study reported perceptions of psychiatric diagnoses being wrongfully used by professionals to minimise the severity of a patient’s self-harm on the basis it was expected or normalised (Quinlivan et al., 2021).

### *Minimisation of distress*

A tendency to minimise patients’ distress was reported in eight studies. Across EDs, GPs and inpatient units, staff were described as uninterested and dismissive of physical and



psychosocial distress (Ejneborn Looi, Engström, & Sävenstedt, 2015; Hagen, Knizek, & Hjelmeland, 2018; Lindkvist et al., 2021; Mughal, Dikomitis, Babatunde, & Chew-Graham, 2021; Xanthopoulou et al., 2022). Three studies set in clinical services reported experiences of staff prioritising cases that they perceived as more ‘serious’ and patients whose injuries were not self-inflicted, further demonstrating professional discrimination (Ejneborn Looi et al., 2015; Fu et al., 2021; Hagen et al., 2018). Minimisation also resulted in care being withheld; patients were told that pain medication and medical treatments were unnecessary, with staff making comments about a ‘waste’ of beds and resources (Byrne et al., 2021; Hagen et al., 2018; Quinlivan et al., 2021). Minimisation led to patients viewing services as “cold” and “robotic”, only responding if a ‘threshold’ of seriousness was met (Byrne et al., 2021).

## **Therapeutic contact**

### *Staff-patient relationship*

Twenty-one studies presented data describing relationships with staff. Within non-clinical services (social services and voluntary sector services), patients generally described a strong rapport between themselves and staff, based on mutual understanding, non-judgemental care, and trust (Cross & Clarke, 2022; Hume & Platt, 2007; Leung, Chow, Ip, & Yip, 2019). However, experiences within clinical services were variable. Studies reporting positive experiences highlighted genuine and sensitive contact as well as mutual understanding to empower patients and encourage them to collaboratively explore their distress (Cliffe & Stallard, 2022; Enoksson, Hultsjo, Wardig, & Stromberg, 2022; Hagen et al., 2018; Hassett & Isbister, 2017; Lindkvist et al., 2021; Michaud, Dorogi, Gilbert, & Bourquin, 2021; Xanthopoulou et al., 2022). This rapport allowed staff to respond to patients’ individual needs for more effective care, such as reacting to fluctuations in suicidality, distress, and instability (Berg, Rortveit, Walby, & Aase, 2020; Quinlivan et al., 2021; Worsley, Barrios, Shuter, Pettit, & Doupnik, 2019). Positive rapport allowed patients to feel acknowledged as human beings, which instilled hope for recovery (Hagen et al., 2018; Worsley et al., 2019).

However, these findings contrasted with reports of superficial contact within clinical services (EDs, inpatient and psychiatric units), whereby patients perceived staff as being disconnected and making little effort to engage with their individual experiences (Bantjes et al., 2017; Cully, Leahy, Shiely, & Arensman, 2022; Idenfors, Kullgren, & Salander Renberg, 2015; Miettinen, Kaunonen, Kylma, Rissanen, & Aho, 2021; O’Keeffe et al., 2021; Quinlivan et al., 2021; Simoes, Dos Santos, & Martinho, 2021; Worsley et al., 2019). Three studies

highlighted how perceived mistrust from clinical staff impaired patients' feeling of safety and willingness to engage (Ejneborn Looi et al., 2015; Holliday & Vandermause, 2015; Hume & Platt, 2007). In one quantitative study, perceptions of unsupportive care were significantly associated with repeat self-harm (Cully et al., 2022).

#### *Relationships with relatives*

Relatives of patients also reported negative experiences within EDs and inpatient units, with four studies highlighting their observations of poor communication from staff. Relatives were often excluded from discussions about patients' care, felt inadequately informed about prognosis and had their concerns dismissed (Fu et al., 2021; Quinlivan et al., 2021; Vandewalle et al., 2019). Relatives experienced superficial and judgemental staff contact, particularly during sensitive discussions about the patients' care and self-harm. This led to a lack of confidence in staff and doubts over the quality of care (O'Keeffe et al., 2021; Quinlivan et al., 2021).

### **Clinical management**

#### *Psychosocial assessment*

Attitudes towards psychosocial assessments within clinical settings were reported in eleven studies. Assessments were described as superficial, rushed, and formulaic, where generic tick-box questions denied opportunities to explore individual experiences and psychosocial difficulties (Berg et al., 2020; Byrne et al., 2021; Quinlivan et al., 2021; Simoes et al., 2021). While good staff knowledge of psychosocial assessment protocols was reported in EDs and psychiatric wards, knowledge about mental health in those settings was seen as insufficient, with patients recommending staff training to help them better assess the context for and severity of a patient's suicidality (Hagen et al., 2018; Holliday & Vandermause, 2015).

Across clinical services, patients and relatives reported a lack of involvement in treatment planning, with unnecessary repetition of questions leading them to believe that staff did not listen or understand their individual experiences (Fu et al., 2021; Quinlivan et al., 2021). However, care was positively experienced when staff were sensitive to patients' emotional distress when completing an assessment, collaboratively explored the factors leading to self-harm and involved patients in treatment decisions (Johnson, Ferguson, & Copley, 2017; Michaud et al., 2021; Worsley et al., 2019; Xanthopoulou et al., 2022).

### *Use of restrictions and coercive care*

Eleven studies reported variable attitudes towards coercive care in clinical services. In five studies, patients and relatives described the benefits of restrictions and removal of potentially lethal objects to protect against further self-harm (Berg et al., 2020; Cully et al., 2022; Hassett & Isbister, 2017; Idenfors et al., 2015; Vandewalle et al., 2019). Many patients experienced EDs and inpatient wards as ‘safe havens’ that removed them from distressing environments (e.g., difficult home dynamics) meaning patients could effectively shift focus towards recovery (Cully et al., 2022; Worsley et al., 2019). Brief admissions empowered some patients as they felt they were given more control over care through joint decision making (Enoksson et al., 2022; Lindkvist et al., 2021). However, other clinical services were experienced more negatively as patients reported feeling disempowered by restrictions (Quinlivan et al., 2021; Simoes et al., 2021). In light of this, patients and relatives expressed the importance of communicative practice when imposing restrictions: where staff in EDs explained the rationale behind restrictions and used collaborative assessments, these mitigated feelings of anxiety and disempowerment (Quinlivan et al., 2021).

### *Discharge and aftercare*

Negative experiences of discharge following an assessment for self-harm in clinical services were reported across 12 studies. Studies reported how patients felt ill-prepared and unsafe at discharge where feelings of abandonment diminished their trust in clinical services and triggered repeat self-harm (Berg et al., 2020; Byrne et al., 2021; Hume & Platt, 2007; Idenfors et al., 2015; Xanthopoulou et al., 2022).

Regarding aftercare, some patients were not contacted by services at all, whilst other patients faced long waiting times (Hunter et al., 2013; Quinlivan et al., 2021). Those who did receive follow-up care were often disappointed due to its brief length, low number of appointments given, and prioritisation of discussions about medication over psychology (Cully et al., 2022; Holliday & Vandermause, 2015; Miettinen et al., 2021; Quinlivan et al., 2021). However, two studies of clinical services investigating experiences of patients on brief admission units described positive accounts of detailed discharge plans and safety planning which provided patients with a sense of security (Enoksson et al., 2022; Lindkvist et al., 2021). Greater control over their care meant patients could readjust back into society comfortably (Enoksson et al., 2022; Lindkvist et al., 2021).

### *Psychotropic medication*

Seven studies reported on attitudes towards medication administration after self-harm, all of which were within clinical services: EDs, inpatient units and community-based psychiatric care. While medication was seen as helpful, staff were perceived to focus more often on describing benefits whilst tending to minimise information on side-effects and risks (Ejneborn Looi et al., 2015; Idenfors et al., 2015). Changes in medication without follow-up consultations from staff led patients to view services as negligent (Hagen et al., 2018; Simoes et al., 2021). Patients and relatives reported that medication was often administered without adjunctive psychological interventions, which they experienced as avoiding problems rather than an effective resolution (Fu et al., 2021; Hunter et al., 2013; Vandewalle et al., 2019).

### **Organisational barriers**

#### *Waiting times*

Nine studies described negative experiences in clinical services of long waiting times across services. For EDs, inpatient and crisis management teams, lengthy waiting times for a psychosocial assessment led to feelings of anxiety, particularly when in busy and loud environments (Bantjes et al., 2017; Byrne et al., 2021; Miettinen et al., 2021; Quinlivan et al., 2021; Williams et al., 2020). Patients and relatives also received little communication regarding the purpose of the wait, reasons for delays and progress (Cully et al., 2022; Vandewalle et al., 2019). Beyond the ED, there were also experiences of long waiting times for aftercare following an initial assessment (Byrne et al., 2021; Miettinen et al., 2021).

In non-clinical settings, experiences were variable. One community-based programme had an average waiting time of 1.7 days between assessment and referral contact, which patients cited as a key reason for high satisfaction (Cross & Clarke, 2022). However, long waiting times within social services were found to heighten patient anxiety (Leung et al., 2019).

#### *Access to care*

Nine studies reported variable access to care across clinical services. EDs, inpatient units and brief admission units were reported as having a lack of beds and staff, which patients felt contributed to excessive waiting times, inappropriate transfers, and premature discharges (Byrne et al., 2021; Enoksson et al., 2022; Johnson et al., 2017; Miettinen et al., 2021). For brief admission, some patients felt the care was less specialised compared to what they would receive in EDs and wanted more options for psychological support (Lindkvist et al., 2021).

However, others felt that they could call on staff freely within brief admission wards and also a sense of predictability and safety, unlike in busy and intense EDs (Lindkvist et al., 2021).

Many patients were unaware of what non-clinical services were available to them and felt that they should be better integrated with clinical services for more accessible care following discharge (Cross & Clarke, 2022; Leung et al., 2019). For social and voluntary services, they suggested extended services hours, telephone/digital appointments, and better staffing to improve accessibility (Idenfors et al., 2015; Leung et al., 2019; Williams et al., 2020).

## Discussion

### *Main findings*

This systematic review of 29 studies examined attitudes towards clinical and non-clinical services of individuals who self-harm, as well as the views of their relatives. Our findings relating to clinical services are comparable to those of the previous review (Taylor et al., 2009) describing negative attitudes towards organisational barriers and clinical management. This suggests little systemic change in clinical service provision for self-harm in the last 16 years. However, our review also included views on non-clinical services, where staff attitudes and therapeutic contact were experienced more positively than in clinical settings.

Patients and relatives reported a lack of individualised and collaborative care within clinical services. This was characterised by superficial and formulaic contact that failed to recognise the complexity of self-harm presentations. These findings may be underpinned by the use of increasingly manualised approach within clinical settings as a means of managing high service demands (Hawton, Lascelles, Pitman, Gilbert, & Silverman, 2022). Clinical staff themselves have previously reported conflicts between meeting professional regulations and providing holistic care (Bhui, 2016).

Our review highlighted that genuine and sensitive therapeutic contact in clinical and non-clinical services was viewed as a positive experience that patients linked to promoting recovery, a finding which comes as no surprise. Previous research has shown how strong therapeutic rapport enables patients to feel valued and acknowledged, leading to increased self-esteem and reduced self-harm ideation (Berg et al., 2020; Elliott, Colangelo, & Gelles, 2005). One reason why efforts to establish strong therapeutic rapport are not apparently occurring as standard is the stigmatising beliefs held by some mental health professionals that

were also described in our review. Previous research examining staff attitudes in EDs, inpatient and primary care services have revealed stigmatising beliefs, mistrust in patients, and reduced compassion toward people who self-harm (MacDonald et al., 2020; Rayner, Blackburn, Edward, Stephenson, & Ousey, 2019; Saunders, Hawton, Fortune, & Farrell, 2012; Vistorte et al., 2018). This difference in attitudes between services may be attributed to a lack of mental health training for staff in primary care, EDs, and other clinical services not traditionally developed for frontline mental healthcare (Caulfield, Vatansever, Lambert, & Van Bortel, 2019). Our findings demonstrate the importance of specialised training around self-harm, to instil positive attitudes and compassion in clinical staff (Ferguson et al., 2019).

The review also highlighted practical difficulties across services pertaining to waiting times, access, and understaffed services. As this finding is comparable to the findings of the previous systematic review (Taylor et al., 2009), it suggests that there has been no tangible investment or improvement in ED services over that period. High service demands are another potential explanation for the rushed and superficial care reported. There has been a large increase in self-harm presentations, especially by adolescents, in recent years putting further pressures on services (Gunnell et al., 2020; McManus et al., 2019). Previous research has highlighted how overwhelmed staff lack the time and resources to provide effective care (Baker & Naidu, 2021; Mahony, 2014).

Perspective on our findings was provided by an individual with lived experience of accessing self-harm services, which is provided to complement our discussion (supplementary materials: S2). Their perspective is that developments in service provisions over the past 15 years have led to exclusion of those who self-harm, and there is no (or limited) long-term treatment offered to people who self-harm. Psychosocial assessments are often seen as a ‘tick-box’ exercise and do not lead to a concrete treatment plan. They suggest that people with lived experience of self-harm should co-produce training for mental health professionals that is trauma-informed and reduces stigma, particularly for those with personality disorders.

### ***Limitations***

Our quality assessment highlighted four studies of low to moderate quality (Bantjes et al., 2017; Cross & Clarke, 2022; Cully et al., 2022; Mughal et al., 2021), but we included these with equal weighting to other studies in our synthesis for comprehensiveness. However, we acknowledge that these may potentially introduce bias. We limited our initial search to

studies published in English, which may explain why all included studies were published in high-and middle-income countries. Moreover, only three of the included studies provided information on participant ethnicity, having either a majority or only white-Caucasian participants. Research has demonstrated that Black, Asian, and Minority Ethnic (BAME) groups experience poor access and quality of care from services due to poor cultural sensitivity and discrimination (Al-Sharifi, Krynicki, & Upthegrove, 2015; Memon et al., 2016). Important attitudes from BAME groups may not have been captured in this review. Furthermore, we did not present findings by age group. This is important considering that self-harm is most prevalent in young people, with both young people and older adults demonstrating high levels of undisclosed self-harm and reduced help-seeking (Gillies et al., 2018; Memon et al., 2016; Troya et al., 2019). Different services are also available for different age groups (e.g., child and adolescent services or adult services), leading to potentially different attitudes.

Included studies inconsistently reported on patients' histories of self-harm and clinical management. Therefore, we could not interpret findings in the wider context of patients' previous experiences of services. Similarly, none of the included studies explicitly examined level of suicidal ideation, and the studies examining both attempted suicide and self-harm presentations did not differentiate findings between the two. While in the UK it is customary not to distinguish between episodes on the basis of intent (Kapur, Cooper, O'Connor, & Hawton, 2013), it is possible that one-off or frequent attendance for recurrent 'non-suicidal self-harm' elicits a less intense service response than presentations where suicidal intent is expressed, creating different experiences of care. As included studies did not permit us to examine this, there is a need for further research examining how experiences differ by suicidal intent.

### ***Implications***

Our findings show that attitudes towards clinical services have shown little improvement in the 16 years since the previous review by a UK-based team (Taylor et al., 2009). This suggests that the range of UK-based (Health, 2017; NICE, 2013) and international (World Health, 2014) guidelines and policies designed to support service provision have had limited impact. To drive real progress in service provision it may be useful to review guidelines based on these findings. Furthermore, the problems commonly identified by patients (long



waiting times, understaffing and limited access to services) have clear implications for the expansion of services, which should be a priority for governments internationally.

With negative staff interactions having a major impact on patient attitudes, policymakers must consider recommendations previously made regarding effective staff training within clinical services (Taylor et al., 2009). Improving staff attitudes and knowledge has been shown to have a wide-scale impact on service quality (Ferguson et al., 2019). This, in turn, has the potential to improve the therapeutic value of psychosocial assessment and improve outcomes demands (Hawton et al., 2022). It may also reduce costs and pressure on services (N. Kapur et al., 2013). Our review also highlighted problems with staff interactions viewed as too standardised and superficial. This demonstrates the importance of the therapeutic relationship, whereby staff should build strong rapport with patients and relatives, involve them in treatment decisions and encompass sufficient flexibility in treatments to ensure that practice is person-centred.

This review substantiates the need for integrated services to maintain quality of care during therapeutic contact, discharge, and transitions in treatment. This is of particular importance during repeated service redesign, especially throughout periods in which the COVID-19 pandemic has impacted service provision. With transformations in services and diversions away from EDs towards other primary, community-based, and remote treatments, including mental health crisis hubs, better collaboration between services can promote effective care while reducing service pressure.

### ***Future research***

With findings demonstrating little improvement in clinical services in the last 16 years, health service researchers and policymakers should monitor the implementation of service guidelines. Research should also address the large gap in the literature pertaining to the attitudes of under-represented groups including older adults, BAME communities and those from low-and middle-income countries. Such groups can offer vital insights that may have not yet been uncovered to broaden our understanding of the quality-of-service provision. Finally, research should evaluate the impact of training and specific service changes on patients and carers' perceptions of services.

### ***Conclusions***



The findings of this review provide insights into attitudes of individuals who self-harm and their relatives toward clinical and non-clinical services, which remain largely unchanged since a previous review 16 years ago. Across services, experiences of organisational and clinical management were largely negative, while staff attitudes and therapeutic contact were more positively experienced in non-clinical services compared to clinical services. Our findings have important implications for staff training and practice and should be used to reform existing healthcare guidelines for acceptable care for patients who self-harm.

#### Financial statement

AP and SR are supported by the National Institute for Health Research (NIHR) University College London Hospital (UCLH) Biomedical Research Centre (BRC).

#### Conflict of interest

AP is a Patron of the Support After Suicide Partnership.  
KH is a member of the National Suicide Prevention Strategy for England Advisory Group and is a National Institute for Health Research Senior Investigator (Emeritus).

#### Ethical approval

All data are in the public domain.

<https://www.cambridge.org/core/journals/psychological-medicine/information/author-instructions/preparing-your-materials>

#### Acknowledgments

Many thanks to our lived experience advisor for your insightful perspectives, time and drive to improve the care for people who self-harm.

## References

- Al-Sharifi, A., Krynicki, C. R., & Upthegrove, R. (2015). Self-harm and ethnicity: A systematic review. *Int J Soc Psychiatry*, *61*(6), 600-612.  
doi:10.1177/0020764015573085
- Arensman, E., Griffin, E., Daly, C., Corcoran, P., Cassidy, E., & Perry, I. J. (2018). Recommended next care following hospital-treated self-harm: Patterns and trends over time. *PLoS One*, *13*(3), e0193587. doi:10.1371/journal.pone.0193587
- Baker, N., & Naidu, K. (2021). The Challenges Faced by Mental Health Care Users in a Primary Care Setting: A Qualitative Study. *Community Mental Health Journal*, *57*(2), 285-293.
- Bantjes, J., Nel, A., Louw, K. A., Frenkel, L., Benjamin, E., & Lewis, I. (2017). 'This place is making me more depressed': The organisation of care for suicide attempters in a South African hospital. *J Health Psychol*, *22*(11), 1434-1446.  
doi:10.1177/1359105316628744
- Berg, S. H., Rortveit, K., Walby, F. A., & Aase, K. (2020). Safe clinical practice for patients hospitalised in mental health wards during a suicidal crisis: qualitative study of patient experiences. *BMJ Open*, *10*(11), e040088. doi:10.1136/bmjopen-2020-040088
- Bhui, K. S. (2016). Smuggling compassion into care: Is the NHS destined for system D? *Australian & New Zealand Journal of Psychiatry*, *50*(7), 611-612.
- Byrne, S. J., Bellairs-Walsh, I., Rice, S. M., Bendall, S., Lamblin, M., Boubis, E., . . . Robinson, J. (2021). A Qualitative Account of Young People's Experiences Seeking Care from Emergency Departments for Self-Harm. *International Journal of Environmental Research & Public Health [Electronic Resource]*, *18*(6).

- Carr, M. J., Ashcroft, D. M., Kontopantelis, E., While, D., Awenat, Y., Cooper, J., . . . Webb, R. T. (2017). Premature Death Among Primary Care Patients With a History of Self-Harm. *Ann Fam Med*, *15*(3), 246-254. doi:10.1370/afm.2054
- Caulfield, A., Vatansever, D., Lambert, G., & Van Bortel, T. (2019). WHO guidance on mental health training: a systematic review of the progress for non-specialist health workers. *BMJ Open*, *9*(1), e024059.
- Cliffe, B., & Stallard, P. (2022). University students' experiences and perceptions of interventions for self-harm. *Journal of Youth Studies*, 1-15. doi:10.1080/13676261.2022.2033187
- Cooper, J., Steeg, S., Bennewith, O., Lowe, M., Gunnell, D., House, A., . . . Kapur, N. (2013). Are hospital services for self-harm getting better? An observational study examining management, service provision and temporal trends in England. *BMJ Open*, *3*(11), e003444. doi:10.1136/bmjopen-2013-003444
- Cooper, J., Steeg, S., Gunnell, D., Webb, R., Hawton, K., Bennewith, O., . . . Kapur, N. (2015). Variations in the hospital management of self-harm and patient outcome: a multi-site observational study in England. *J Affect Disord*, *174*, 101-105. doi:10.1016/j.jad.2014.11.037
- Covidence systematic review software, V. H. I., Melbourne, Australia. Available at [www.covidence.org](http://www.covidence.org). . (2021).
- Cross, M., & Clarke, T. (2022). Rapid response pathway united to reduce self-harm (RUSH): a case study of a pilot pathway for children and young people. *Journal of Public Mental Health*, *21*(1), 15-22. doi:10.1108/Jpmh-09-2021-0112
- Cully, G., Leahy, D., Shiely, F., & Arensman, E. (2022). Patients' Experiences of Engagement with Healthcare Services Following a High-Risk Self-Harm Presentation

- to a Hospital Emergency Department: A Mixed Methods Study. *Arch Suicide Res*, 26(1), 91-111. doi:10.1080/13811118.2020.1779153
- Ejneborn Looi, G. M., Engström, Å., & Sävenstedt, S. (2015). A self-destructive care: self-reports of people who experienced coercive measures and their suggestions for alternatives. *Issues Ment Health Nurs*, 36(2), 96-103. doi:10.3109/01612840.2014.951134
- Elliott, G. C., Colangelo, M. F., & Gelles, R. J. (2005). Mattering and Suicide Ideation: Establishing and Elaborating a Relationship. *Social Psychology Quarterly*, 68(3), 223-238. doi:10.1177/019027250506800303
- Enoksson, M., Hultsjo, S., Wardig, R. E., & Stromberg, S. (2022). Experiences of how brief admission influences daily life functioning among individuals with borderline personality disorder (BPD) and self-harming behaviour. *Journal of Clinical Nursing*, 31(19-20), 2910-2920.
- Fazel, S., & Runeson, B. (2020). Suicide. Reply. *N Engl J Med*, 382(21), e66. doi:10.1056/NEJMc2002190
- Ferguson, M., Dollman, J., Jones, M., Cronin, K., James, L., Martinez, L., & Procter, N. (2019). Suicide Prevention Training - Improving the Attitudes and Confidence of Rural Australian Health and Human Service Professionals. *Crisis*, 40(1), 15-26. doi:10.1027/0227-5910/a000524
- Foster, T., Gillespie, K., & McClelland, R. (1997). Mental disorders and suicide in Northern Ireland. *Br J Psychiatry*, 170, 447-452. doi:10.1192/bjp.170.5.447
- Fox, K. R., Franklin, J. C., Ribeiro, J. D., Kleiman, E. M., Bentley, K. H., & Nock, M. K. (2015). Meta-analysis of risk factors for nonsuicidal self-injury. *Clinical Psychology Review*, 42, 156-167. doi:<https://doi.org/10.1016/j.cpr.2015.09.002>

- Fu, X., Yang, J., Liao, X., Shen, Y., Ou, J., Li, Y., & Chen, R. (2021). Parents' and medical staff's experience of adolescents with suicide-related behaviors admitted to a general hospital in China: qualitative study. *BMC Psychiatry*, *21*(1), 62. doi:10.1186/s12888-021-03057-w
- Geulayov, G., Casey, D., Bale, L., Brand, F., Clements, C., Farooq, B., . . . Hawton, K. (2019). Suicide following presentation to hospital for non-fatal self-harm in the Multicentre Study of Self-harm: a long-term follow-up study. *Lancet Psychiatry*, *6*(12), 1021-1030. doi:10.1016/S2215-0366(19)30402-X
- Gillies, D., Christou, M. A., Dixon, A. C., Featherston, O. J., Rapti, I., Garcia-Anguita, A., . . . Christou, P. A. (2018). Prevalence and Characteristics of Self-Harm in Adolescents: Meta-Analyses of Community-Based Studies 1990-2015. *J Am Acad Child Adolesc Psychiatry*, *57*(10), 733-741. doi:10.1016/j.jaac.2018.06.018
- Gunnell, D., Appleby, L., Arensman, E., Hawton, K., John, A., Kapur, N., . . . Collaboration, C.-S. P. R. (2020). Suicide risk and prevention during the COVID-19 pandemic. *Lancet Psychiatry*, *7*(6), 468-471. doi:10.1016/S2215-0366(20)30171-1
- Gunnell, D., Hawton, K., Ho, D., Evans, J., O'Connor, S., Potokar, J., . . . Kapur, N. (2008). Hospital admissions for self harm after discharge from psychiatric inpatient care: cohort study. *BMJ*, *337*, a2278. doi:10.1136/bmj.a2278
- Hagen, J., Knizek, B. L., & Hjelmeland, H. (2018). Former suicidal inpatients' experiences of treatment and care in psychiatric wards in Norway. *Int J Qual Stud Health Well-being*, *13*(1), 1461514. doi:10.1080/17482631.2018.1461514
- Hassett, A., & Isbister, C. (2017). Young Men's Experiences of Accessing and Receiving Help From Child and Adolescent Mental Health Services Following Self-Harm. *SAGE Open*, *7*(4), 2158244017745112. doi:10.1177/2158244017745112

- Hawton, K., Lascelles, K., Pitman, A., Gilbert, S., & Silverman, M. (2022). Assessment of suicide risk in mental health practice: shifting from prediction to therapeutic assessment, formulation, and risk management. *Lancet Psychiatry*, 9(11), 922-928. doi:10.1016/S2215-0366(22)00232-2
- Hawton, K., Saunders, K., & O'Connor, R. C. (2012). Self-harm and suicide in adolescents. *The Lancet*, 379(9834), 2373-2382. doi:[https://doi.org/10.1016/S0140-6736\(12\)60322-5](https://doi.org/10.1016/S0140-6736(12)60322-5)
- Hawton, K., Zahl, D., & Weatherall, R. (2003). Suicide following deliberate self-harm: long-term follow-up of patients who presented to a general hospital. *Br J Psychiatry*, 182, 537-542. doi:10.1192/bjp.182.6.537
- Health, D. o. (2017). *Preventing suicide in England. Third progress report on the cross-government outcomes strategy to save lives*. Retrieved from <https://www.gov.uk/government/publications/suicide-prevention-third-annualreport>
- Holliday, C., & Vandermause, R. (2015). Teen experiences following a suicide attempt. *Arch Psychiatr Nurs*, 29(3), 168-173. doi:10.1016/j.apnu.2015.02.001
- Hong, Q. N., Fabregues, S., Bartlett, G., Boardman, F., Cargo, M., Dagenais, P., . . . Pluye, P. (2018). The Mixed Methods Appraisal Tool (MMAT) version 2018 for information professionals and researchers. *Education for Information*, 34(4), 285-291. doi:10.3233/Efi-180221
- Hume, M., & Platt, S. (2007). Appropriate interventions for the prevention and management of self-harm: a qualitative exploration of service-users' views. *BMC Public Health*, 7, 9. doi:10.1186/1471-2458-7-9
- Hunter, C., Chantler, K., Kapur, N., & Cooper, J. (2013). Service user perspectives on psychosocial assessment following self-harm and its impact on further help-seeking: a qualitative study. *J Affect Disord*, 145(3), 315-323. doi:10.1016/j.jad.2012.08.009

- Idenfors, H., Kullgren, G., & Salander Renberg, E. (2015). Professional care after deliberate self-harm: a qualitative study of young people's experiences. *Patient Preference Adherence*, 9, 199-207. doi:10.2147/PPA.S76244
- Johnson, D. R., Ferguson, K., & Copley, J. (2017). Residential staff responses to adolescent self-harm: The helpful and unhelpful. *Clinical Child Psychology and Psychiatry*, 22(3), 443-454. doi:10.1177/1359104516689378
- Kapur, N., Cooper, J., O'Connor, R. C., & Hawton, K. (2013). Non-suicidal self-injury v. attempted suicide: new diagnosis or false dichotomy? *The British Journal of Psychiatry*, 202(5), 326-328. doi:10.1192/bjp.bp.112.116111
- Kapur, N., Steeg, S., Webb, R., Haigh, M., Bergen, H., Hawton, K., . . . Cooper, J. (2013). Does clinical management improve outcomes following self-harm? Results from the multicentre study of self-harm in England. *PLoS One*, 8(8), e70434. doi:10.1371/journal.pone.0070434
- Leather, J. Z., O'Connor, R. C., Quinlivan, L., Kapur, N., Campbell, S., & Armitage, C. J. (2020). Healthcare professionals' implementation of national guidelines with patients who self-harm. *Journal of Psychiatric Research*, 130, 405-411. doi:<https://doi.org/10.1016/j.jpsychires.2020.08.031>
- Leung, M., Chow, C. B., Ip, P. P., & Yip, S. P. (2019). Self-harm attempters' perception of community services and its implication on service provision. *Int J Nurs Sci*, 6(1), 50-57. doi:10.1016/j.ijnss.2018.12.003
- Lindkvist, R. M., Westling, S., Eberhard, S., Johansson, B. A., Rask, O., & Landgren, K. (2021). 'A Safe Place Where I Am Welcome to Unwind When I Choose to'- Experiences of Brief Admission by Self-Referral for Adolescents Who Self-Harm at Risk for Suicide: A Qualitative Study. *International Journal of Environmental Research & Public Health [Electronic Resource]*, 19(1). doi:10.3390/ijerph19010300

- MacDonald, S., Sampson, C., Turley, R., Biddle, L., Ring, N., Begley, R., & Evans, R. (2020). Patients' Experiences of Emergency Hospital Care Following Self-Harm: Systematic Review and Thematic Synthesis of Qualitative Research. *Qual Health Res*, 30(3), 471-485. doi:10.1177/1049732319886566
- Mahony, C. (2014). 2013 was a horrible year for nursing--nurses are "burnt out," says chief. *BMJ*, 348, g126. doi:10.1136/bmj.g126
- McManus, S., Gunnell, D., Cooper, C., Bebbington, P. E., Howard, L. M., Brugha, T., . . . Appleby, L. (2019). Prevalence of non-suicidal self-harm and service contact in England, 2000-14: repeated cross-sectional surveys of the general population. *Lancet Psychiatry*, 6(7), 573-581. doi:10.1016/S2215-0366(19)30188-9
- Memon, A., Taylor, K., Mohebati, L. M., Sundin, J., Cooper, M., Scanlon, T., & de Visser, R. (2016). Perceived barriers to accessing mental health services among black and minority ethnic (BME) communities: a qualitative study in Southeast England. *BMJ Open*, 6(11), e012337. doi:10.1136/bmjopen-2016-012337
- Michaud, L., Dorogi, Y., Gilbert, S., & Bourquin, C. (2021). Patient perspectives on an intervention after suicide attempt: The need for patient centred and individualized care. *PLoS One*, 16(2), e0247393. doi:10.1371/journal.pone.0247393
- Miettinen, T. M., Kaunonen, M., Kylma, J., Rissanen, M. L., & Aho, A. L. (2021). Experiences of Help From the Perspective of Finnish People Who Self-Harmed During Adolescence. *Issues Ment Health Nurs*, 42(10), 917-928. doi:10.1080/01612840.2021.1904468
- Mitten, N., Preyde, M., Lewis, S., Vanderkooy, J., & Heintzman, J. (2016). The perceptions of adolescents who self-harm on stigma and care following inpatient psychiatric treatment. *Social Work in Mental Health*, 14(1), 1-21. doi:10.1080/15332985.2015.1080783



- Moher, D., Liberati, A., Tetzlaff, J., Altman, D. G., & Group, P. (2009). Preferred reporting items for systematic reviews and meta-analyses: the PRISMA statement. *PLoS Med*, 6(7), e1000097. doi:10.1371/journal.pmed.1000097
- Muehlenkamp, J. J., Claes, L., Havertape, L., & Plener, P. L. (2012). International prevalence of adolescent non-suicidal self-injury and deliberate self-harm. *Child Adolesc Psychiatry Ment Health*, 6, 10. doi:10.1186/1753-2000-6-10
- Mughal, F., Dikomitis, L., Babatunde, O. O., & Chew-Graham, C. A. (2021). Experiences of general practice care for self-harm: a qualitative study of young people's perspectives. *Br J Gen Pract*, 71(711), e744-e752. doi:10.3399/BJGP.2021.0091
- NICE. (2013). *Self-Harm quality standard (QS34)* National Institute for Health Research, UK Retrieved from <https://www.nice.org.uk/guidance/qs34/history>
- NICE. (2022). *Self-harm: assessment, management and preventing recurrence*. Retrieved from <https://www.nice.org.uk/guidance/ng225>
- O'Keeffe, S., Suzuki, M., Ryan, M., Hunter, J., & McCabe, R. (2021). Experiences of care for self-harm in the emergency department: comparison of the perspectives of patients, carers and practitioners. *BJPsych Open*, 7(5), e175. doi:10.1192/bjo.2021.1006
- Popay, J., Roberts, H., Sowden, A., Petticrew, M., Arai, L., Rodgers, M., Britten, N., Roen, K., Duffy, S., . (2006). *Guidance on the Conduct of Narrative Synthesis in Systematic Reviews*. Retrieved from <https://www.lancaster.ac.uk/media/lancaster-university/content-assets/documents/fhm/dhr/chir/NSsynthesisguidanceVersion1-April2006.pdf>
- Quinlivan, L. M., Gorman, L., Littlewood, D. L., Monaghan, E., Barlow, S. J., Campbell, S. M., . . . Kapur, N. (2021). 'Relieved to be seen'-patient and carer experiences of psychosocial assessment in the emergency department following self-harm: qualitative analysis of 102 free-text survey responses. *BMJ Open*, 11(5), e044434.

- Rayner, G., Allen, S., & Johnson, M. (2005). Countertransference and self-injury: a cognitive behavioural cycle. *Journal of Advanced Nursing*, *50*(1), 12-19.
- Rayner, G., Blackburn, J., Edward, K. L., Stephenson, J., & Ousey, K. (2019). Emergency department nurse's attitudes towards patients who self-harm: A meta-analysis. *Int J Ment Health Nurs*, *28*(1), 40-53. doi:10.1111/inm.12550
- Ribeiro Coimbra, L. R., & Noakes, A. (2022). A systematic review into healthcare professionals' attitudes towards self-harm in children and young people and its impact on care provision. *Journal of Child Health Care*, *26*(2), 290-306. doi:10.1177/13674935211014405
- Saunders, K. E. A., Hawton, K., Fortune, S., & Farrell, S. (2012). Attitudes and knowledge of clinical staff regarding people who self-harm: A systematic review. *Journal of Affective Disorders*, *139*(3), 205-216. doi:10.1016/j.jad.2011.08.024
- Simoes, R. M. P., Dos Santos, J. C. P., & Martinho, M. (2021). Adolescents with suicidal behaviours: A qualitative study about the assessment of Inpatient Service and Transition to Community. *J Psychiatr Ment Health Nurs*, *28*(4), 622-631. doi:10.1111/jpm.12707
- Taylor, T. L., Hawton, K., Fortune, S., & Kapur, N. (2009). Attitudes towards clinical services among people who self-harm: systematic review. *Br J Psychiatry*, *194*(2), 104-110. doi:10.1192/bjp.bp.107.046425
- Tormoen, A. J., Myhre, M., Walby, F. A., Groholt, B., & Rossow, I. (2020). Change in prevalence of self-harm from 2002 to 2018 among Norwegian adolescents. *Eur J Public Health*, *30*(4), 688-692. doi:10.1093/eurpub/ckaa042
- Troya, M. I., Babatunde, O., Polidano, K., Bartlam, B., McCloskey, E., Dikomitis, L., & Chew-Graham, C. A. (2019). Self-harm in older adults: systematic review. *Br J Psychiatry*, *214*(4), 186-200. doi:10.1192/bjp.2019.11

- Vandewalle, J., Beeckman, D., Van Hecke, A., Debyser, B., Deproost, E., & Verhaeghe, S. (2019). 'Promoting and preserving safety and a life-oriented perspective': A qualitative study of nurses' interactions with patients experiencing suicidal ideation. *Int J Ment Health Nurs*, 28(5), 1119-1131. doi:10.1111/inm.12623
- Vistorte, A. O. R., Ribeiro, W. S., Jaen, D., Jorge, M. R., Evans-Lacko, S., & Mari, J. J. (2018). Stigmatizing attitudes of primary care professionals towards people with mental disorders: A systematic review. *Int J Psychiatry Med*, 53(4), 317-338. doi:10.1177/0091217418778620
- Williams, A. J., Nielsen, E., & Coulson, N. S. (2020). "They aren't all like that": Perceptions of clinical services, as told by self-harm online communities. *J Health Psychol*, 25(13-14), 2164-2177. doi:10.1177/1359105318788403
- Witt, K. G., Hetrick, S. E., Rajaram, G., Hazell, P., Taylor Salisbury, T. L., Townsend, E., & Hawton, K. (2021a). Interventions for self-harm in children and adolescents. *Cochrane Database Syst Rev*, 3(3), Cd013667. doi:10.1002/14651858.CD013667.pub2
- Witt, K. G., Hetrick, S. E., Rajaram, G., Hazell, P., Taylor Salisbury, T. L., Townsend, E., & Hawton, K. (2021b). Psychosocial interventions for self-harm in adults. *Cochrane Database Syst Rev*, 4(4), Cd013668. doi:10.1002/14651858.CD013668.pub2
- World Health, O. (2014). *Preventing suicide: a global imperative*. Geneva: World Health Organization.
- Worsley, D., Barrios, E., Shuter, M., Pettit, A. R., & Doupnik, S. K. (2019). Adolescents' Experiences During "Boarding" Hospitalization While Awaiting Inpatient Psychiatric Treatment Following Suicidal Ideation or Suicide Attempt. *Hosp Pediatr*, 9(11), 827-833. doi:10.1542/hpeds.2019-0043

Xanthopoulou, P., Ryan, M., Lomas, M., & McCabe, R. (2022). Psychosocial Assessment in the Emergency Department. *Crisis, 43*(4), 299-306. doi:10.1027/0227-5910/a000786

Figure 1. PRISMA flowchart describing the study selection process

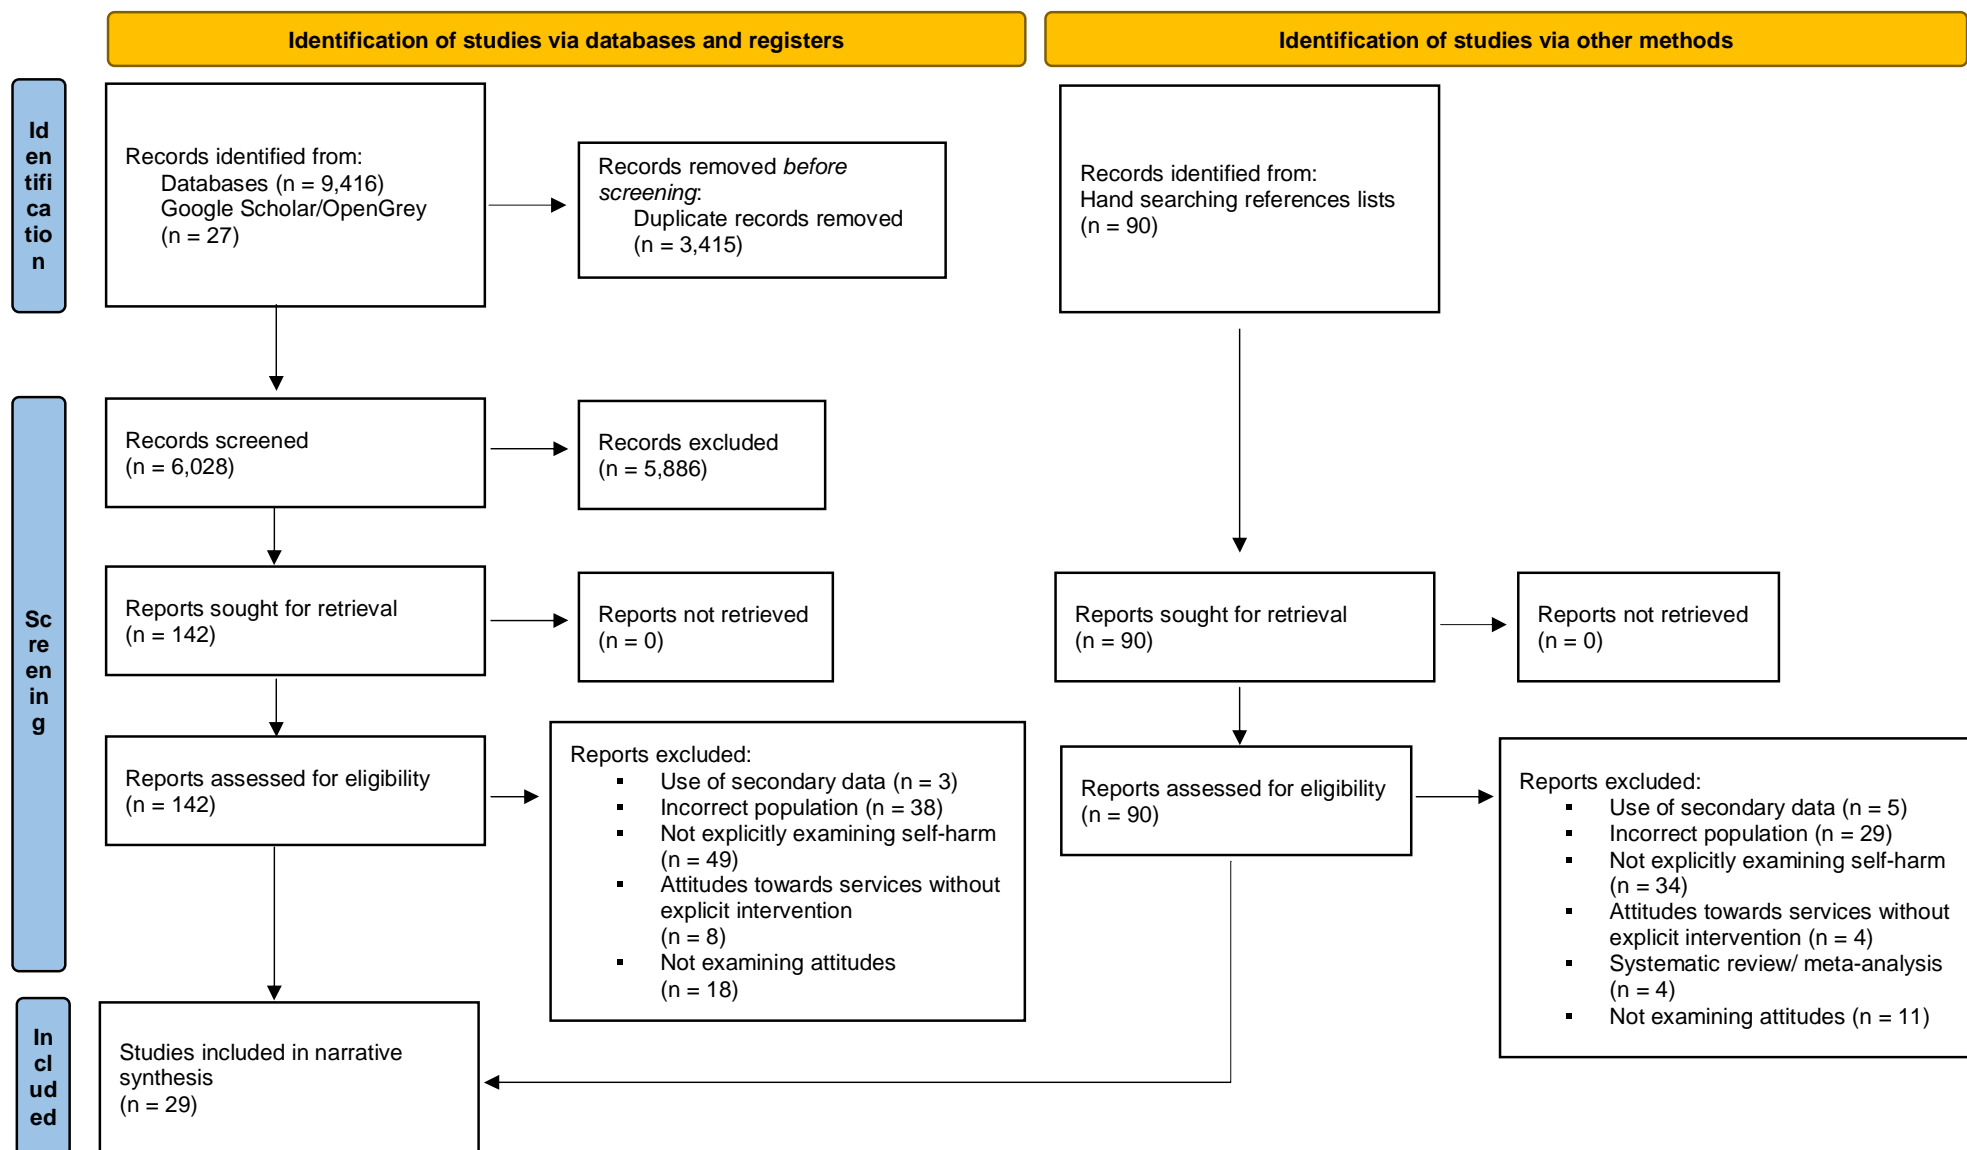

| Study (country)                     | Sample characteristics                                                                              | Phenomena of interest          | Type of service & intervention                                                      | Study Methods              | Measures of attitude                                                                                                                                                                                                                               | Data analysis                                               | Summary of findings                                                                                                                                                                                                                                                       |
|-------------------------------------|-----------------------------------------------------------------------------------------------------|--------------------------------|-------------------------------------------------------------------------------------|----------------------------|----------------------------------------------------------------------------------------------------------------------------------------------------------------------------------------------------------------------------------------------------|-------------------------------------------------------------|---------------------------------------------------------------------------------------------------------------------------------------------------------------------------------------------------------------------------------------------------------------------------|
| <b>QUALITATIVE STUDIES</b>          |                                                                                                     |                                |                                                                                     |                            |                                                                                                                                                                                                                                                    |                                                             |                                                                                                                                                                                                                                                                           |
| Bantjes et al. 2016<br>South Africa | N=80<br>Demographics N/S                                                                            | Attempted suicide              | Emergency psychiatric unit<br>Generic short-term provision                          | In-depth interviews        | Two interview topics: <ul style="list-style-type: none"> <li>Experience of hospital care</li> <li>Ideas of how hospitals can reduce risk of future harm</li> </ul>                                                                                 | Narrative synthesis using ethnological approach             | <ul style="list-style-type: none"> <li>Positive experience of receiving care e.g., empathy and understanding but disruption of therapeutic relationships</li> <li>Poor staff communication</li> <li>Busy service experienced as unsettling and frightening</li> </ul>     |
| Berg et al. 2020<br>Norway          | N=18<br>Patients' age: 18-57 years (M=40.0)<br>Patients' gender: 11 female, 7 male<br>Ethnicity N/S | Attempted suicide              | Specialist service, acute medical wards, short term crisis ward<br>Intervention N/S | Semi-structured interviews | Interview guide including experience of hospitalisation, safety, treatment from staff, communication, and impact of care on subsequent suicidal ideation                                                                                           | Inductive thematic analysis using phenomenological approach | <p>Three themes:</p> <ul style="list-style-type: none"> <li>Positive experience of safe and sensitive care to suicidal ideation</li> <li>Mixed experience of tailor-made, collaborative care</li> <li>Mixed experience of protected adaptive practice</li> </ul>          |
| Byrne et al. (2021)<br>Australia    | N=13<br>Age: 17-25 years (M=21.2)<br>Gender: 11 female, 1 male, 1 non-binary<br>Ethnicity N/S       | Self-harm or attempted suicide | ED<br>Generic short-term provision                                                  | Semi-structured interviews | Three interview topics: <ul style="list-style-type: none"> <li>What happened during time at ED</li> <li>Positive aspects of the experience</li> <li>Negative aspects of the experience</li> <li>Recommendations for service improvement</li> </ul> | Thematic analysis                                           | <p>Three interrelated themes:</p> <ul style="list-style-type: none"> <li>ED was experienced as distressing</li> <li>ED environment and care was often counter-therapeutic</li> <li>Hospital staff perceived as disinterested, dismissive, and lacked knowledge</li> </ul> |

| Study (country)               | Sample characteristics                                                                | Phenomena of interest          | Type of service & intervention                                     | Study Methods               | Measures of attitude                                                                                                                                                                               | Data analysis     | Summary of findings                                                                                                                                                                                                                                                                                                                                                                                                                                                                                                                                  |
|-------------------------------|---------------------------------------------------------------------------------------|--------------------------------|--------------------------------------------------------------------|-----------------------------|----------------------------------------------------------------------------------------------------------------------------------------------------------------------------------------------------|-------------------|------------------------------------------------------------------------------------------------------------------------------------------------------------------------------------------------------------------------------------------------------------------------------------------------------------------------------------------------------------------------------------------------------------------------------------------------------------------------------------------------------------------------------------------------------|
| Cliffe & Stallard 2021<br>UK  | N=25<br>Age: 18-31 Years<br>Gender: 20 Female, 4 Male, 1 Non-Binary<br>Ethnicity: N/S | Self-Harm                      | Mixed Interventions – Online and Face to Face Professional support | Semi Structured Interviews  | Interview questions focused on student experiences and preferences of self-harm interventions                                                                                                      | Thematic Analysis | <ul style="list-style-type: none"> <li>Some students felt that they were made to feel self-conscious when accessing face to face support</li> <li>Online support was helpful as it could be accessed at any time. This was seen as better in managing impulses to self-harm than waiting for face-to-face help.</li> <li>Human connection was seen as a valuable tool in making patients feel safe, secure, and heard.</li> <li>Most interventions are too short term which is not helpful in addressing the reasons behind self-harming.</li> </ul> |
| Enoksson et al 2021<br>Sweden | N=16<br>Age: 21-44 Years (M: 32.5)<br>Gender: 14 female, 2 male<br>Ethnicity: N/S     | Self-Harm                      | Brief self-admission                                               | Semi structured interviews. | Three interview topics: <ul style="list-style-type: none"> <li>Experience of care</li> <li>Influences on daily life and routines</li> </ul> Influence on relationships                             | Thematic analysis | <ul style="list-style-type: none"> <li>Support creates a feeling of security</li> <li>Reduced impulse to self-harm as a strategy is put in place</li> <li>Support promotes a sense of determination</li> </ul>                                                                                                                                                                                                                                                                                                                                       |
| Fu et al. 2021<br>China       | N=15<br>Age N/S<br>Gender: 11 female (mothers), 4 male (fathers)<br>Ethnicity N/S     | Self-harm or attempted suicide | Psychiatric inpatient unit<br>Intervention N/S                     | Semi-structured interviews  | Interview topics for parents: <ul style="list-style-type: none"> <li>Hospitalisation experience</li> <li>Thoughts on medical staff &amp; areas of improvement</li> <li>Adequacy of care</li> </ul> | Thematic analysis | Parents experienced dissatisfaction with existing hospital service within two themes: <ul style="list-style-type: none"> <li>Doubt over hospitalisation treatment e.g., understanding of mental health and medication</li> <li>Advice for healthcare services including better communication, individualised care</li> </ul>                                                                                                                                                                                                                         |

| Study (country)                    | Sample characteristics                                               | Phenomena of interest                                                                             | Type of service & intervention                            | Study Methods               | Measures of attitude                                                                                                                                                                                                                                                                              | Data analysis                            | Summary of findings                                                                                                                                                                                                                                                                                                                                                                                                                                                                                                                                                 |
|------------------------------------|----------------------------------------------------------------------|---------------------------------------------------------------------------------------------------|-----------------------------------------------------------|-----------------------------|---------------------------------------------------------------------------------------------------------------------------------------------------------------------------------------------------------------------------------------------------------------------------------------------------|------------------------------------------|---------------------------------------------------------------------------------------------------------------------------------------------------------------------------------------------------------------------------------------------------------------------------------------------------------------------------------------------------------------------------------------------------------------------------------------------------------------------------------------------------------------------------------------------------------------------|
| Hagen et al. 2018<br>Norway        | N=5<br>Age: 33-54 years<br>Gender: 4 female, 1 male<br>Ethnicity N/S | Attempted suicide (self-poisoning or hanging)                                                     | Psychiatric hospital unit<br>Generic short-term provision | Semi-structured interviews  | Interview schedule, with questions of hospital experience:<br><ul style="list-style-type: none"> <li>Experience of hospitalisation</li> <li>Encounters with professionals</li> <li>Positive and negative contact with professionals</li> <li>Most important aspects of hospitalisation</li> </ul> | Interpretative phenomenological analysis | Three themes:<br><ul style="list-style-type: none"> <li>Positive experiences of a sense of companionship with staff</li> <li>Mixed experiences of individualised treatment which impacted patients' feeling of value</li> <li>Strong support to promote recovery</li> </ul>                                                                                                                                                                                                                                                                                         |
| Holliday & Vandermause 2015<br>USA | N=6<br>Age: 15-19 years<br>Gender: 5 female, 1 male<br>Ethnicity N/S | Attempted suicide                                                                                 | ED<br>Generic short-term provision                        | Unstructured interviews     | Interview questions centred on experience of ED and positive and negative aspects of care                                                                                                                                                                                                         | Hermeneutic phenomenological analysis    | <ul style="list-style-type: none"> <li>Negative experiences of transitioning into different services</li> <li>Negative experience of interpersonal contact, isolation, and poor rapport</li> <li>Positive experience of safety protocols</li> </ul>                                                                                                                                                                                                                                                                                                                 |
| Hassett & Isbister 2017<br>UK      | N=8<br>Gender : all male<br>Age: 16-18 Years<br>Ethnicity: N/S       | Self-Harm:<br>Cutting, overdose, scratching, burning, strangulation, head banging, punching walls | Engagement with CAMHS                                     | Semi Structured Interviews. | Topics surrounding experience of receiving help from CAMHS                                                                                                                                                                                                                                        | Thematic Analysis                        | <ul style="list-style-type: none"> <li>Positive experience of having their experiences normalised by practitioners as this challenged the stigma around masculinity and weakness.</li> <li>Positive experience of being taught skills which allowed patients to regain a sense of control.</li> <li>Knowing that help was voluntary allowed for a feeling of independence.</li> <li>Positive experiences of the therapeutic relationship developed between patient and practitioner. Particularly where patients felt they were being treated as equals.</li> </ul> |



| Study (country)                | Sample characteristics                                                                           | Phenomena of interest                | Type of service & intervention                                                                                                                            | Study Methods              | Measures of attitude                                                                                                                                                                                                                                                                                                                                                       | Data analysis                            | Summary of findings                                                                                                                                                                                                                                                                                                                                         |
|--------------------------------|--------------------------------------------------------------------------------------------------|--------------------------------------|-----------------------------------------------------------------------------------------------------------------------------------------------------------|----------------------------|----------------------------------------------------------------------------------------------------------------------------------------------------------------------------------------------------------------------------------------------------------------------------------------------------------------------------------------------------------------------------|------------------------------------------|-------------------------------------------------------------------------------------------------------------------------------------------------------------------------------------------------------------------------------------------------------------------------------------------------------------------------------------------------------------|
| Hume & Platt 2007<br>UK        | N=14<br>Age: 20-49 years<br>Gender: 6 female, 8 male<br>Ethnicity: N/S                           | Self-harm                            | Inpatient units, EDs, GPs, community psychiatric teams, social care, Samaritans<br><br>Psychosocial assessment, general short-term provision, social care | Semi-structured interviews | Seed categories used to guide interview including questions on experiences, attitudes and feelings about treatments and interventions                                                                                                                                                                                                                                      | Grounded Theory                          | Various experiences of care: <ul style="list-style-type: none"> <li>▪ Dissatisfaction with after-care</li> <li>▪ Need for mutual understanding and support from healthcare staff</li> <li>▪ Preference for community care over hospital-based settings</li> </ul>                                                                                           |
| Hunter et al. 2013<br>UK       | N=13 (7 at follow-up)<br>Age: early 20s - early 60s<br>Gender: 6 female, 7 male<br>Ethnicity N/S | Self-harm (cutting and/or poisoning) | Specialist self-harm unit<br><br>Psychosocial assessment                                                                                                  | Semi-structured interviews | Initial interview topics: <ul style="list-style-type: none"> <li>▪ Experience of service</li> <li>▪ Experience of psychosocial assessment</li> <li>▪ Outcome of assessment</li> <li>▪ Improving suggestions</li> </ul> Follow-up interview topics: <ul style="list-style-type: none"> <li>▪ Impact/outcome of attendance</li> <li>▪ Further self-harm behaviour</li> </ul> | Interpretative phenomenological analysis | <ul style="list-style-type: none"> <li>▪ Unclear purpose of psychosocial assessment</li> <li>▪ Positive experience of validation and emotional support</li> <li>▪ Negative experience of shame and feeling ignored, particularly for those with a personality disorder</li> <li>▪ Mixed experience of transitioning out of care and of aftercare</li> </ul> |
| Idenfors et al. 2015<br>Sweden | N=9<br>Age: 17-24 years<br>Gender: 5 female, 4 male<br>Ethnicity N/S                             | Self-harm (cutting and/or poisoning) | ED, child and adolescent psychiatric unit, psychiatric ward<br><br>Interventions N/S                                                                      | Semi-structured interviews | Open-ended questions based on experiences of professional care, highlighting shortcoming, positive aspects, and barriers                                                                                                                                                                                                                                                   | Content analysis                         | Three themes <ul style="list-style-type: none"> <li>▪ A need to be in good hands by professionals speaking the same language and showing trust</li> <li>▪ Help not matching life circumstances e.g., practical support and individual needs</li> <li>▪ A lack of autonomy in care</li> </ul>                                                                |

| Study (country)                | Sample characteristics                                                                | Phenomena of interest                                       | Type of service & intervention                       | Study Methods               | Measures of attitude                                                                                                               | Data analysis     | Summary of findings                                                                                                                                                                                                                                                                                                                                                                 |
|--------------------------------|---------------------------------------------------------------------------------------|-------------------------------------------------------------|------------------------------------------------------|-----------------------------|------------------------------------------------------------------------------------------------------------------------------------|-------------------|-------------------------------------------------------------------------------------------------------------------------------------------------------------------------------------------------------------------------------------------------------------------------------------------------------------------------------------------------------------------------------------|
| Johnson et al. 2017<br>UK      | N=7<br>Age: 14-16 years<br>Gender: 4 female, 3 male<br>Ethnicity: all White Caucasian | Self-harm                                                   | Residential care or Secure unit<br>Interventions N/S | Semi-structured interviews  | Interview questions based on helpful and unhelpful staff responses, how to improve practice and support from staff                 | Content analysis  | Global themes of safety and care: <ul style="list-style-type: none"> <li>Good levels of safety but often intrusive</li> <li>Staff had adequate level of care but need for collaboration and empathy</li> </ul>                                                                                                                                                                      |
| Leung et al. 2019<br>China     | N=11<br>Age: 25-58 years<br>Gender: 9 female, 2 male<br>Ethnicity N/S                 | Self-harm or attempted suicide (overdose, burning, cutting) | Community social services<br>Intervention N/S        | Semi-structured interviews  | Interview questions based on access to services, staff involvement, helpful and unhelpful aspects, and suggestions for improvement | Content analysis  | Four main themes <ul style="list-style-type: none"> <li>Mixed experience of service availability</li> <li>Negative experience of accessibility</li> <li>Positive experience of affordability</li> <li>Positive reports of acceptability including therapeutic relationship and follow-up care</li> </ul>                                                                            |
| Lindkvist et al 2021<br>Sweden | N=19<br>Gender: all female<br>Age: 14-19 Years<br>Ethnicity: N/S                      | Recurrent self-harm and suicidal behaviour.                 | Brief admission                                      | Semi structured interviews. | Two interview topics: <ul style="list-style-type: none"> <li>Experience of care</li> <li>Long term effects</li> </ul>              | Thematic analysis | <ul style="list-style-type: none"> <li>Feeling safe and relieved</li> <li>Welcoming atmosphere by professionals</li> <li>Feeling independent &amp; less of a burden on loved ones.</li> <li>Growing from self-reflection</li> <li>Receiving insufficient attention</li> <li>Feeling less prioritised than others</li> <li>Reports of unprofessional behaviour from staff</li> </ul> |

| Study (country)                 | Sample characteristics   | Phenomenon of interest | Type of service & intervention                                                                                                  | Study Methods                                      | Measures of attitude                                                                                                                                                                                                   | Data analysis     | Summary of findings                                                                                                                                                                                                                                                                                                                                                                                                                                                                                                                     |
|---------------------------------|--------------------------|------------------------|---------------------------------------------------------------------------------------------------------------------------------|----------------------------------------------------|------------------------------------------------------------------------------------------------------------------------------------------------------------------------------------------------------------------------|-------------------|-----------------------------------------------------------------------------------------------------------------------------------------------------------------------------------------------------------------------------------------------------------------------------------------------------------------------------------------------------------------------------------------------------------------------------------------------------------------------------------------------------------------------------------------|
| Looi et al. 2015<br>Sweden      | N=19<br>Demographics N/S | Self-harm              | Psychiatric inpatient unit<br>Intervention N/S                                                                                  | Online self-report survey with open-text responses | Free text form with participants asked to report: <ul style="list-style-type: none"> <li>Their experience of the care they received</li> <li>Their perception of alternatives to coercive treatment methods</li> </ul> | Content analysis  | Three themes: <ul style="list-style-type: none"> <li>Negative experiences of neglect and a desire to be understood and heard</li> <li>Experience of distrust between staff and patients and a need for mutual relation</li> </ul> Experience of counterproductive and superficial care                                                                                                                                                                                                                                                  |
| Michaud et al 2021<br>Canada    | N=41<br>Demographics N/S | Suicide attempts       | Specialised intervention group following a suicide attempt (Having a case manager, a crisis plan, meetings and follow up calls) | Semi Structured Interviews                         | Experience of the intervention group in aiding recovery                                                                                                                                                                | Thematic analysis | <ul style="list-style-type: none"> <li>Valued the human and professional qualities of nurses</li> <li>Appreciated follow-up calls and meetings</li> <li>Negative perceptions of joint planning with poor therapeutic relationship and understanding of difficulties</li> </ul>                                                                                                                                                                                                                                                          |
| Miettinen et al 2021<br>Finland | N=27<br>Demographics N/S | Self-Harm.             | A range of professional services.                                                                                               | Essays and Interviews                              | Overall experiences of a broad range of options for help following self-harm in adolescents.                                                                                                                           | Content Analysis  | <ul style="list-style-type: none"> <li>Feelings of not being taken seriously in their distress.</li> <li>Feelings that professionals were ill equipped to address matters of self-harm upon seeing the injuries.</li> <li>Lack of information regarding the programme of treatment and then a lack of monitoring led to feelings of abandonment.</li> <li>Frequent change of professionals led to inadequate therapeutic alliances</li> <li>Positive experience of group therapies with individuals who have similar issues.</li> </ul> |

| Study (country)              | Sample characteristics                                                                                                                                                            | Phenomena of interest | Type of service & intervention                                                  | Study Methods               | Measures of attitude                                                                                                                 | Data analysis               | Summary of findings                                                                                                                                                                                                                                                                                                                                                                  |
|------------------------------|-----------------------------------------------------------------------------------------------------------------------------------------------------------------------------------|-----------------------|---------------------------------------------------------------------------------|-----------------------------|--------------------------------------------------------------------------------------------------------------------------------------|-----------------------------|--------------------------------------------------------------------------------------------------------------------------------------------------------------------------------------------------------------------------------------------------------------------------------------------------------------------------------------------------------------------------------------|
| Mitten et al. 2015<br>Canada | N=12<br>Age: 15-19 years (M=15.74)<br>Gender: 11 female, 1 male, 1 non-binary<br>Ethnicity N/S                                                                                    | Self-harm             | Inpatient psychiatric unit<br>Generic short-term provision, crisis intervention | Semi-structured interviews  | Interview questions on stigma and experience of care                                                                                 | Content analysis            | <ul style="list-style-type: none"> <li>Experience of stigma from staff</li> <li>Positive experiences of physical and mental healthcare e.g., procedural knowledge from staff</li> </ul>                                                                                                                                                                                              |
| Mughal et al. 2021<br>UK     | N=13<br>Age: 19-25 years (M=22.08)<br>Gender: 12 females, 1 transgender male<br>Ethnicity N/S                                                                                     | Self-harm             | GP<br>Generic short-term provision                                              | Semi-structured interviews  | Interview topic guide including: <ul style="list-style-type: none"> <li>Experiences of GP care</li> <li>Access to GP care</li> </ul> | Reflexive thematic analysis | <p>Three themes:</p> <ul style="list-style-type: none"> <li>Difficulties in help-seeking avenues</li> <li>Barriers to support from GPs e.g., superficial care, dismissal</li> <li>Facilitators to care e.g., listening, understanding, and relationship-based care</li> </ul>                                                                                                        |
| O'Keeffe et al. 2021<br>UK   | N= 27 (19 patients and 8 carers)<br>Patient gender: 16 female, 3 male<br>Carer gender: all female<br>Patient age: 17-77 years (M=39)<br>Carer age: 48-77 (M=59)<br>Ethnicity: N/S | Self-Harm             | ED                                                                              | Semi Structured Interviews. | Experiences of receiving care                                                                                                        | Thematic Analysis           | <ul style="list-style-type: none"> <li>Patients felt judged for seeking help which exacerbates feelings of distress</li> <li>Patients felt accessing emergency services lacked human connection which they need to feel like their life is not hopeless.</li> <li>Patients felt that the standard questions asked are not an adequate way of addressing individual needs.</li> </ul> |

| Study (country)                  | Sample characteristics                                                                                                                                                                                           | Phenomenon of interest                                         | Type of service & intervention      | Study Methods                     | Measures of attitude                                                                                                                                                                                         | Data analysis     | Summary of findings                                                                                                                                                                                                                                                                                                                                                                                                                                                                                                                 |
|----------------------------------|------------------------------------------------------------------------------------------------------------------------------------------------------------------------------------------------------------------|----------------------------------------------------------------|-------------------------------------|-----------------------------------|--------------------------------------------------------------------------------------------------------------------------------------------------------------------------------------------------------------|-------------------|-------------------------------------------------------------------------------------------------------------------------------------------------------------------------------------------------------------------------------------------------------------------------------------------------------------------------------------------------------------------------------------------------------------------------------------------------------------------------------------------------------------------------------------|
| Quinlivan et al. 2021<br>UK      | N= 102<br>(88 patients and 14 carers)<br><br>Patient age: 18-75 years (M= 34)<br>Carer age: 41-73 years (M=56)<br><br>Patient gender: 72 female, 16 male<br>Carer gender: 13 female, 1 male<br><br>Ethnicity N/S | Self-harm                                                      | ED<br><br>Psychosocial assessment   | Online free-text survey responses | Interview questions designed to explore patient and carer experiences of assessment following self-harm                                                                                                      | Thematic analysis | Themes based on before, during and after assessment: <ul style="list-style-type: none"> <li>Compassionate, collaborative, and supportive care reduced likelihood of repeat self-harm</li> <li>Greater distress experienced due to stigma, overly standardised assessments, and invasive questions</li> <li>Poor after-care leading to despondency</li> </ul>                                                                                                                                                                        |
| Simones et al 2021<br>Portugal   | N=33<br><br>Age:10-19 years<br><br>Gender: 24 female, 9 male<br><br>Ethnicity: N/S                                                                                                                               | Recurrent suicidal behaviour.                                  | Hospitalization and aftercare.      | Semi structured interviews.       | Four interview topics: <ul style="list-style-type: none"> <li>Most important aspects of hospitalisation</li> <li>Experience of care post discharge</li> <li>Family involvement</li> </ul> Protective factors | Thematic analysis | <ul style="list-style-type: none"> <li>Positive feelings of being understood and acknowledged</li> <li>Being able to be away from everything to be taken care of</li> <li>Negative experiences around feeling locked away and isolated</li> <li>Not enough one on one activities</li> <li>Lack of personalised care</li> <li>Medication changes without patient consultation.</li> </ul>                                                                                                                                            |
| Vandewalle et al 2021<br>Belgium | N=14<br><br>Age: 23-66 years (M= 42)<br><br>Gender: 10 females, 4 males<br><br>Ethnicity: N/S                                                                                                                    | Family members experience of admission for a suicidal relative | In patient mental health admission. | Semi structured interviews.       | Two interview topics: <ul style="list-style-type: none"> <li>Expectations vs experience of care for family member</li> <li>Own experience of care and support</li> </ul>                                     | Thematic analysis | <ul style="list-style-type: none"> <li>Carers felt was listened to by professionals</li> <li>Concerns over lack of personalised care</li> <li>Feeling uninvolved and uninformed in care</li> <li>Concerns that carers were left unsupervised for long periods of time following a patient's suicide attempt</li> <li>Not enough continuity or handover between professionals which led to patient/carers being asked the same emotionally charged questions repeatedly</li> <li>Insufficient support following discharge</li> </ul> |

| Study (country)                | Sample characteristics                                                                                 | Phenomena of interest                                               | Type of service & intervention                                                    | Study Methods                                            | Measures of attitude                                                                                                                                                                                                                                                                              | Data analysis               | Summary of findings                                                                                                                                                                                                                                                                                                                                                                                                                                                     |
|--------------------------------|--------------------------------------------------------------------------------------------------------|---------------------------------------------------------------------|-----------------------------------------------------------------------------------|----------------------------------------------------------|---------------------------------------------------------------------------------------------------------------------------------------------------------------------------------------------------------------------------------------------------------------------------------------------------|-----------------------------|-------------------------------------------------------------------------------------------------------------------------------------------------------------------------------------------------------------------------------------------------------------------------------------------------------------------------------------------------------------------------------------------------------------------------------------------------------------------------|
| Williams et al. 2018<br>UK     | N=209<br>Demographics N/S                                                                              | Self-harm                                                           | GP, ED, inpatient and community crisis teams<br><br>Intervention N/S              | Online messages forum from self-harm support communities | Data extraction of information relating to service experience from online message forum                                                                                                                                                                                                           | Thematic analysis           | <ul style="list-style-type: none"> <li>▪ Difficulty in accessing services</li> <li>▪ Positive experiences of medical support as a gateway to psychological therapy</li> <li>▪ Fears over stigma, being misunderstood and confidentiality</li> </ul>                                                                                                                                                                                                                     |
| Worsley et al. 2019<br>USA     | N=27<br>Age: 9-18 years<br>Gender: 11 female, 12 male and 4 transgender or non-binary<br>Ethnicity N/S | Attempted suicide                                                   | Psychiatric inpatient unit<br><br>Awaiting psychosocial assessment and management | Semi-structured interviews                               | Interview topics: <ul style="list-style-type: none"> <li>▪ Perceptions of interactions with the clinical team</li> <li>▪ What practices were beneficial</li> <li>▪ Positive or negative experiences about care and hospital stay</li> <li>▪ What should be changed about hospital stay</li> </ul> | Thematic analysis           | <p>Eight themes:</p> <ul style="list-style-type: none"> <li>▪ Positive experiences of clinical interactions</li> <li>▪ Unmet information needs</li> <li>▪ Distressing experiences of repetitive inquiries</li> <li>▪ Safety concerns</li> <li>▪ Bringing up fears related to previous hospital treatment</li> <li>▪ Need to be engaged in activities to avoid boredom</li> <li>▪ Positive physical comfort</li> <li>▪ Mixed emotions following hospital care</li> </ul> |
| Xanthopoulos et al. 2021<br>UK | N=28<br>Age: 18-78 (M=35.36)<br>Gender: 19 female, 9 male<br>Ethnicity: 27 White Caucasian, 1 Indian   | Self-harm or attempted suicide<br><br>(Overdose, hanging, drowning) | ED/Liaison Psychiatry<br><br>Psychosocial assessment and referral                 | Semi-structured interview                                | Interview questions regarding professional conduct, communication, treatment planning, feeling after assessment and areas for improvement                                                                                                                                                         | Inductive thematic analysis | <p>Two themes:</p> <ul style="list-style-type: none"> <li>▪ Positive experiences of therapeutic conversations</li> <li>▪ Negative experiences of formulaic assessment</li> </ul>                                                                                                                                                                                                                                                                                        |

| Study (country)              | Sample characteristics                                                                                    | Phenomenon of interest                                                                | Type of service & intervention                                                                      | Study Methods                                                                     | Measures of attitude                                                                                                                                                                                                                                | Data analysis                                                                                                          | Summary of findings                                                                                                                                                                                                                                                                                                                                                                                                                                                                                                                                                                                                                                                                                |
|------------------------------|-----------------------------------------------------------------------------------------------------------|---------------------------------------------------------------------------------------|-----------------------------------------------------------------------------------------------------|-----------------------------------------------------------------------------------|-----------------------------------------------------------------------------------------------------------------------------------------------------------------------------------------------------------------------------------------------------|------------------------------------------------------------------------------------------------------------------------|----------------------------------------------------------------------------------------------------------------------------------------------------------------------------------------------------------------------------------------------------------------------------------------------------------------------------------------------------------------------------------------------------------------------------------------------------------------------------------------------------------------------------------------------------------------------------------------------------------------------------------------------------------------------------------------------------|
| <b>MIXED-METHODS STUDIES</b> |                                                                                                           |                                                                                       |                                                                                                     |                                                                                   |                                                                                                                                                                                                                                                     |                                                                                                                        |                                                                                                                                                                                                                                                                                                                                                                                                                                                                                                                                                                                                                                                                                                    |
| Cross & Clarke 2022<br>UK    | N=61<br>Age: 12-17 Years<br>Gender: 56 Female<br>5 Male<br>Ethnicity: 64.5% White,<br>27.4% Not disclosed | Self-Harm<br><br>(Cutting, scratching, hitting, pinching, reducing intake, poisoning) | Community based therapeutic programme.                                                              | Semi structured questionnaire                                                     | Qualitative: Semi Structured questionnaire.<br><br>Quantitative: Satisfaction questionnaire.                                                                                                                                                        | Qualitative data: Thematic analysis.<br><br>Quantitative data: Wilcoxon Signed-Ranks test                              | Qualitative: <ul style="list-style-type: none"> <li>Friendly, responsive, and non-judgmental practitioners.</li> <li>Quick speed at which they were contacted and seen.</li> <li>An appreciation for individually tailored care; useful tools and strategies provided.</li> </ul> Quantitative: statistically significant reduction in: <ul style="list-style-type: none"> <li>depression scores (<math>p &lt; 0.001</math>);</li> <li>total anxiety scores (<math>p &lt; 0.001</math>);</li> <li>total anxiety and depression scores (<math>p &lt; 0.001</math>), all with moderate effect size (<math>r = 0.47</math>, <math>r = 0.45</math> and <math>r = 0.49</math>, respectively)</li> </ul> |
| Cully et al. 2020<br>Ireland | N=32<br>Age: 18-68 years (M=42)<br>Gender: 18 female, 14 male<br>Ethnicity N/S                            | Self-harm                                                                             | EDs, inpatient unit<br><br>Psychosocial assessment, medical treatment, generic short-term provision | Qualitative: semi-structured interviews<br><br>Quantitative: closed questionnaire | Interview topics: <ul style="list-style-type: none"> <li>Contact with mental health service</li> <li>Role of services following self-harm presentation</li> <li>Challenges with appointments</li> <li>Benefits experienced from services</li> </ul> | Qualitative data: thematic analysis<br><br>Quantitative data: statistical analysis using Chi Squared or <i>t</i> -test | Qualitative: <ul style="list-style-type: none"> <li>Mixed experience of care and support</li> <li>Care described as comprehensive but lacked continuity</li> <li>Experience of safety during crisis</li> </ul> Quantitative: <ul style="list-style-type: none"> <li>*Significant relationship between unsupportive care and: <ul style="list-style-type: none"> <li>feelings of hopelessness (<math>p=0.008</math>)</li> <li>repetition of self-harm (<math>p=0.037</math>)</li> <li>lower self-efficacy (<math>p=0.038</math>)</li> </ul> </li> </ul>                                                                                                                                             |

| Study (country) | Sample characteristics | Phenomenon of interest | Type of service & intervention | Study Methods | Measures of attitude | Data analysis | Summary of findings |
|-----------------|------------------------|------------------------|--------------------------------|---------------|----------------------|---------------|---------------------|
|-----------------|------------------------|------------------------|--------------------------------|---------------|----------------------|---------------|---------------------|

N/S = not specified by authors  
 N/A = not applicable  
 M= mean  
 ED = emergency department  
 GP = general practitioner





|                                                                                               | Lindkvist et al 2021 | Looi et al. 2015 | Michaud et al 2021 | Miettinen et al 2021 | Mitten et al 2015 | Mughal et al. 2021 | O'Keefe et al 2021 | Quinlivan et al. 2021 | Simones et al 2021 | Vandewalle et al 2021 | Williams et al. 2018 | Worsley et al. 2019 | Xanthopoulou et al. 2021 |
|-----------------------------------------------------------------------------------------------|----------------------|------------------|--------------------|----------------------|-------------------|--------------------|--------------------|-----------------------|--------------------|-----------------------|----------------------|---------------------|--------------------------|
| Is the qualitative approach appropriate to answer the research question?                      | ✓                    | ✓                | ✓                  | ✓                    | ✓                 | ✓                  | ✓                  | ✓                     | ✓                  | ✓                     | ✓                    | ✓                   | ✓                        |
| Are the qualitative data collection methods adequate to address the research question?        | ✓                    | ✓                | ✓                  | ✓                    | ✓                 | ✓                  | ✓                  | ✓                     | ✓                  | ✓                     | ✓                    | ✓                   | ✓                        |
| Are the findings adequately derived from the data?                                            | ✓                    | ✓                | ✓                  | ✓                    | ✓                 | ✓                  | ✓                  | ✓                     | ✓                  | ✓                     | ✓                    | ✓                   | ✓                        |
| Is the interpretation of results sufficiently substantiated by data?                          | ✓                    | ✓                | ✓                  | ✓                    | ✓                 | x                  | ✓                  | ✓                     | ✓                  | ✓                     | ✓                    | ✓                   | ✓                        |
| Is there coherence between qualitative data sources, collection, analysis and interpretation? | ✓                    | ✓                | ✓                  | ✓                    | ✓                 | x                  | ✓                  | ✓                     | ✓                  | ✓                     | ✓                    | ✓                   | ✓                        |

✓ = yes, x = no, ? = can't tell

Table 2b. Quality assessment ratings for mixed-methods study using the MMAT

|                                                                                                                    | Cully et al.<br>2020 | Cross &<br>Clarke<br>2022 |
|--------------------------------------------------------------------------------------------------------------------|----------------------|---------------------------|
| <b>QUALITATIVE</b>                                                                                                 |                      |                           |
| Is the qualitative approach appropriate to answer the research question?                                           | ✓                    | ✓                         |
| Are the qualitative data collection methods adequate to address the research question?                             | ✓                    | ✓                         |
| Are the findings adequately derived from the data?                                                                 | ✓                    | ✓                         |
| Is the interpretation of results sufficiently substantiated by data?                                               | ✓                    | ✓                         |
| Is there coherence between qualitative data sources, collection, analysis, and interpretation?                     | ✓                    | ✓                         |
| <b>QUANTITATIVE DESCRIPTIVE</b>                                                                                    |                      |                           |
| Is the sampling strategy relevant to address the research question?                                                | ✓                    | ✓                         |
| Is the sample representative of the target population?                                                             | ?                    | ✓                         |
| Are the measurements appropriate?                                                                                  | ✓                    | ✓                         |
| Is the risk of non-response bias low?                                                                              | ?                    | ?                         |
| Is the statistical analysis appropriate to answer the research question?                                           | ✓                    | ✓                         |
| <b>MIXED-METHODS</b>                                                                                               |                      |                           |
| Is there an adequate rationale for using a mixed methods design to address the research question?                  | ✓                    | ✓                         |
| Are the different components of the study effectively integrated to answer the research question?                  | x                    | ✓                         |
| Are the outputs of the integration of qualitative and quantitative components adequately interpreted?              | ✓                    | ✓                         |
| Are divergences and inconsistencies between quantitative and qualitative results adequately addressed?             | ✓                    | ?                         |
| Do the different components of the study adhere to the quality criteria of each tradition of the methods involved? | ✓                    | ✓                         |

✓ = yes, x = no, ? = can't tell
